# Supplementary figures and images for: Regularized estimation of large-scale gene association networks using graphical Gaussian models
Source: Springer Nature journal article supplement (doi:10.1186/1471-2105-10-384), 2009-11-24

**3 clusters**

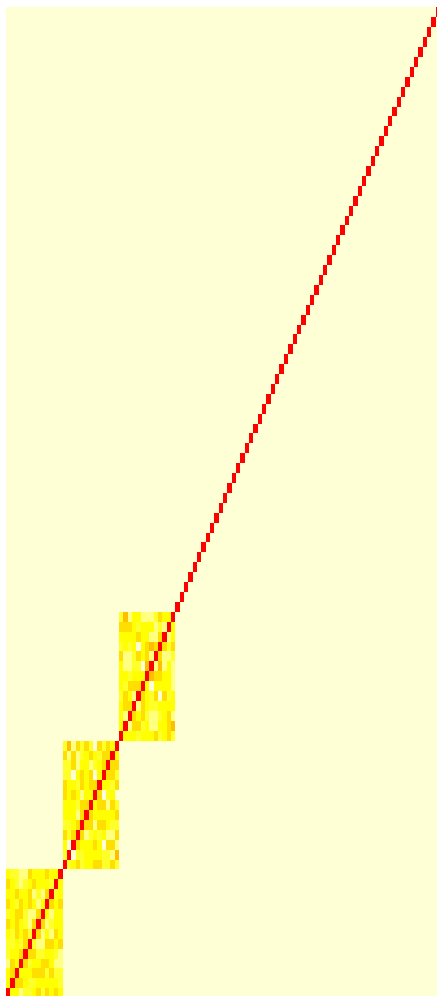

**3 stars**

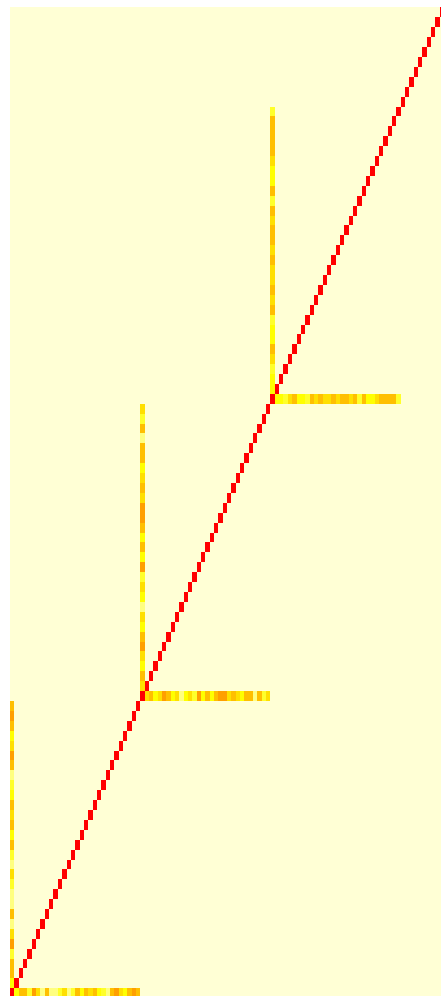

Supplement: Additional file 1 [file 1471-2105-10-384-s1.pdf]

**n = 125**

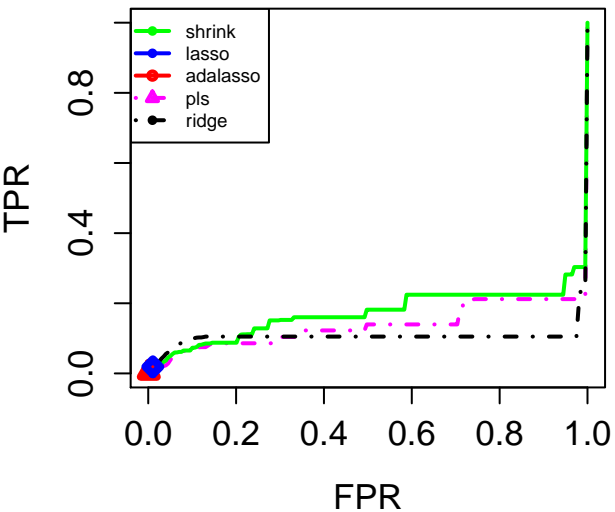

**n = 150**

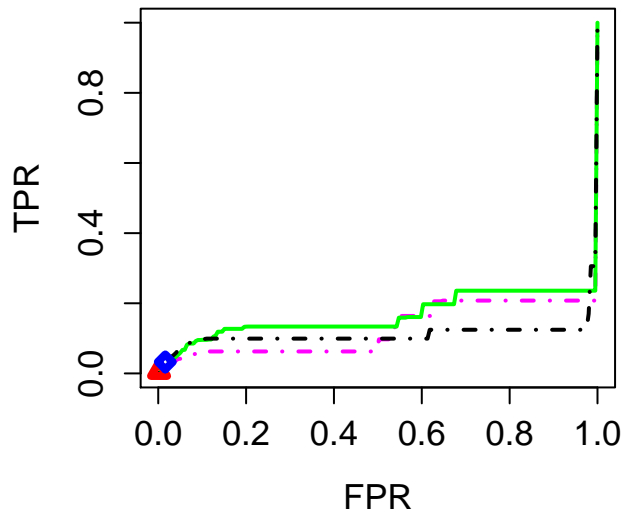

**n = 175**

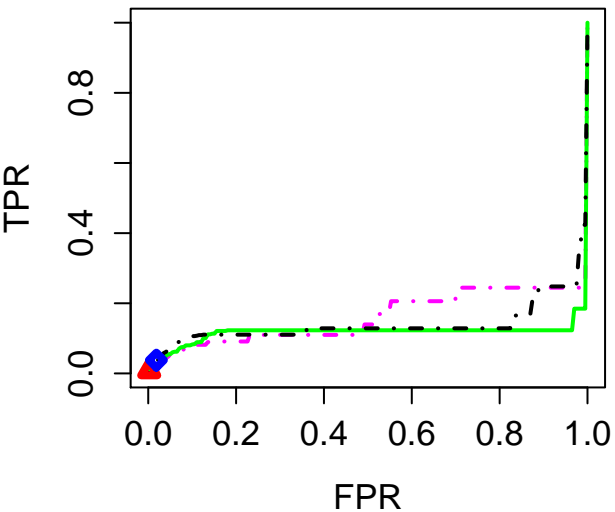

**n = 200**

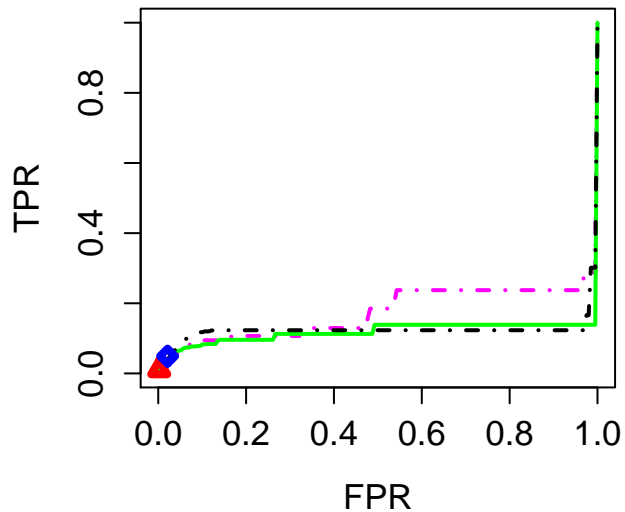

Supplement: Additional file 12 [file 1471-2105-10-384-s12.pdf]
